# Supplementary material
Source: MDPI journal article supplement (https://www.mdpi.com/2072-4292/11/4/433)

Supplemental material for:  
**Validation of Copernicus Sentinel-2 cloud masks obtained from MAJA,  
Sen2Cor and FMask processors using reference cloud masks gener-  
ated with a supervised active learning procedure**  
L.Baetens, C. Desjardins, O. Hagolle

The following pages provide a comparison of the masks provided by MAJA, FMask and Sen2cor to the reference image provided by the ALCD method. For each page, the top left image shows a red, green, blue composite image from Sentinel-2 Level 1C product, on which *clouds* are outlined in green, *cloud shadows* in yellow, *water* in blue and *snow* in purple.

The 3 other images in each page show the comparison of each processor to ALCD reference masks (top-right, MAJA, bottom-left, FMask, and bottom-right, Sen2Cor). Green colour corresponds to true positive, deep blue to true negative, red colour to false negative and purple to false positive. The site, tilename and date are provided under each top-left image.

In each figure, the dates are expressed using format YYYYMMDD.

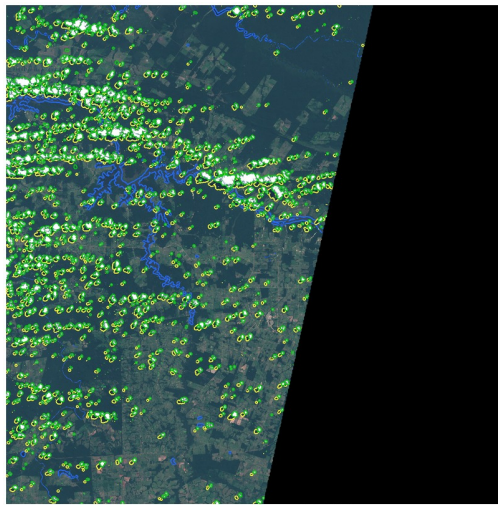

Alta\_Floresta\_Brazil\_21LWK\_20180505

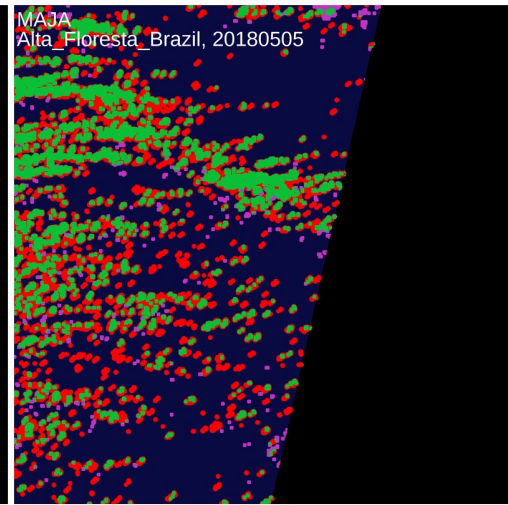

MAJA

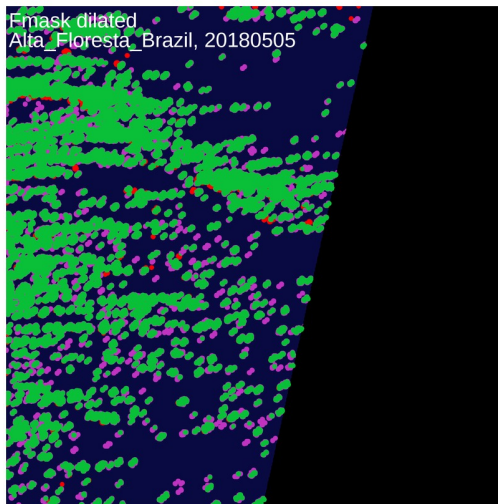

FMask

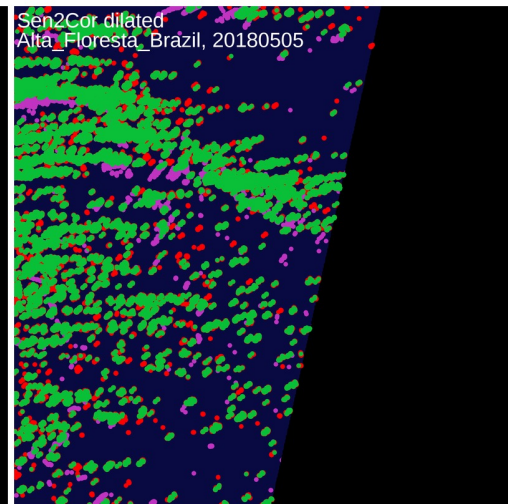

Sen2cor

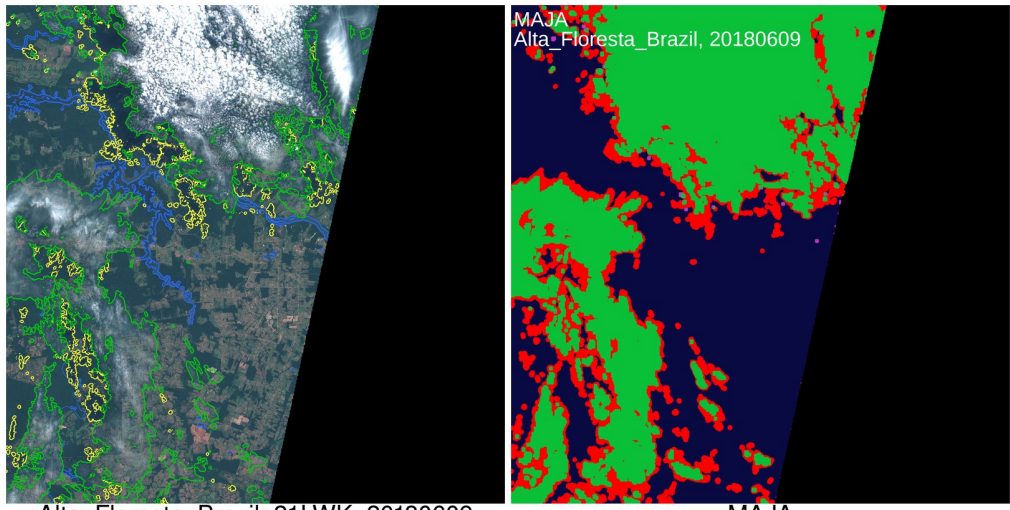

Alta\_Floresta\_Brazil\_21LWK\_20180609

MAJA

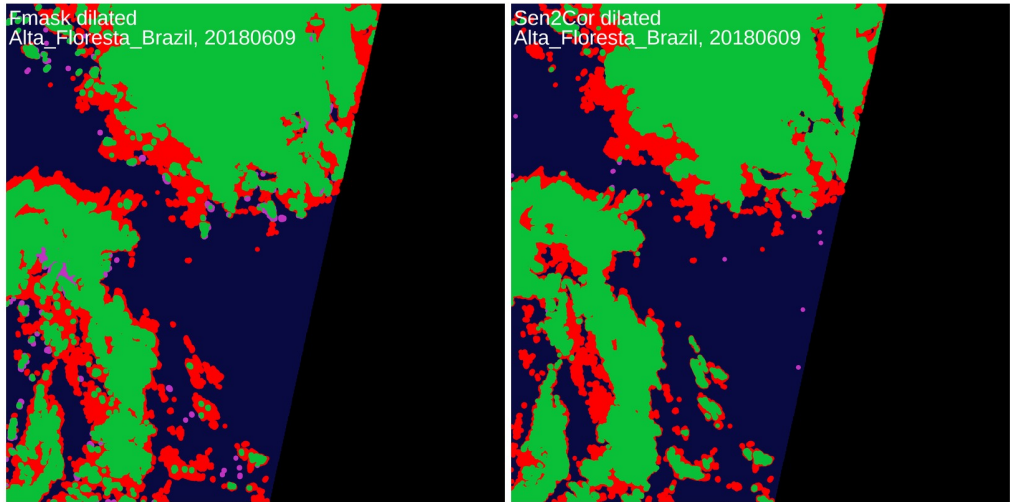

FMask

Sen2cor

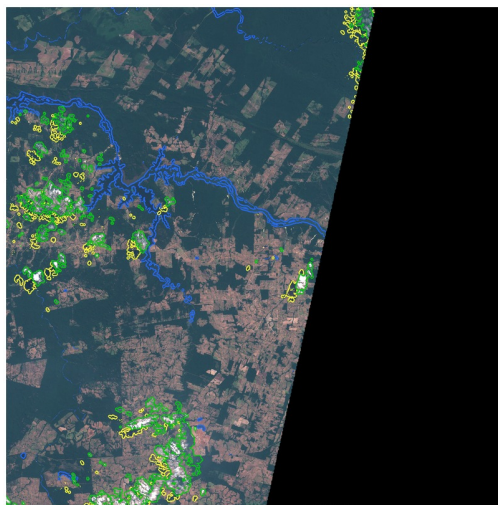

Alta\_Floresta\_Brazil\_21LWK\_20180714

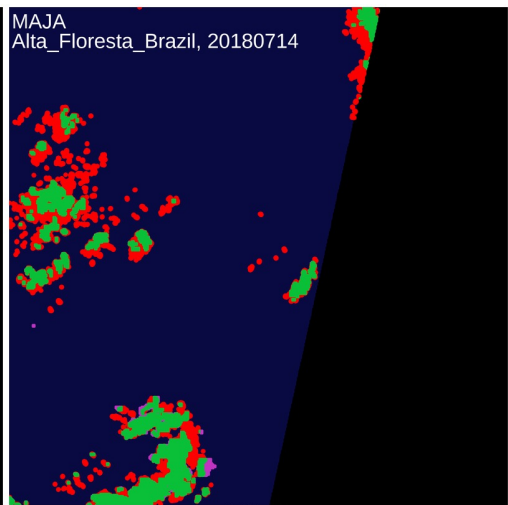

MAJA

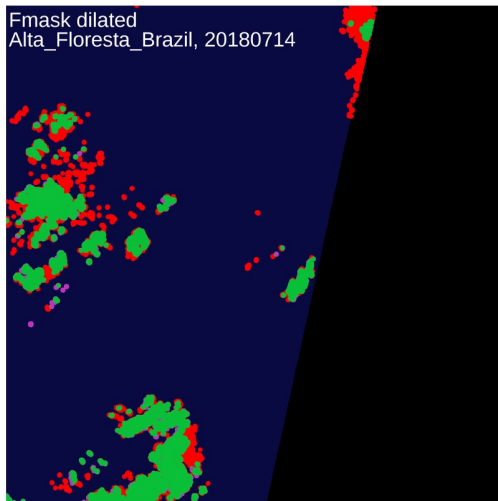

FMask

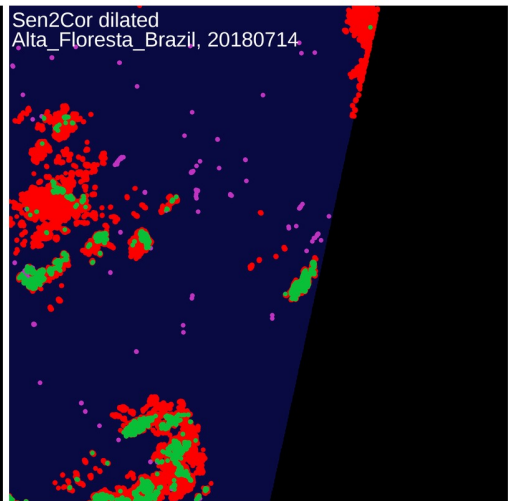

Sen2cor

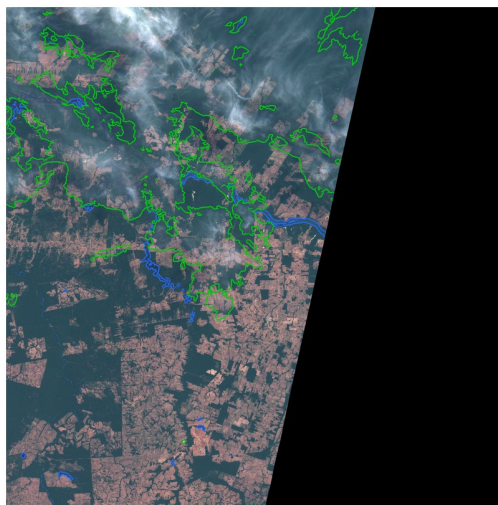

Alta\_Floresta\_Brazil\_21LWK\_20180813

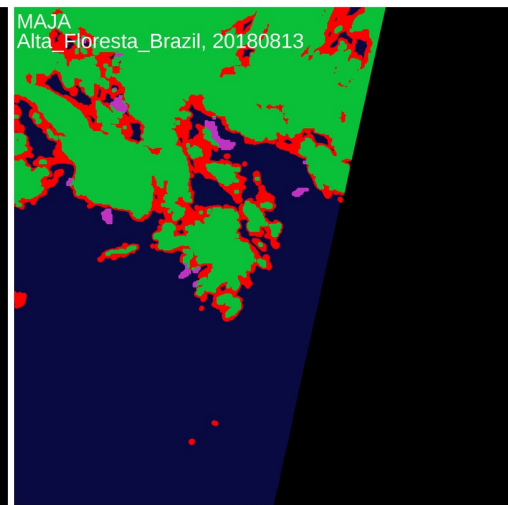

MAJA

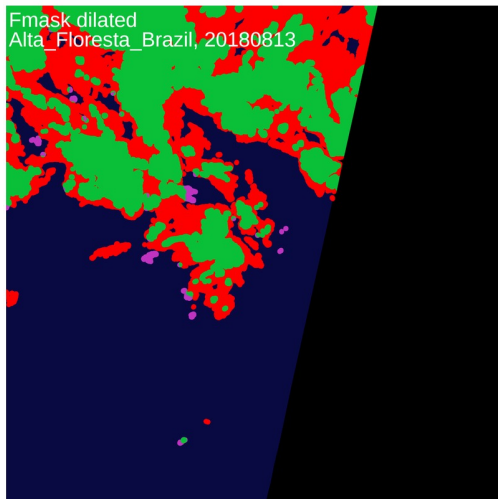

FMask

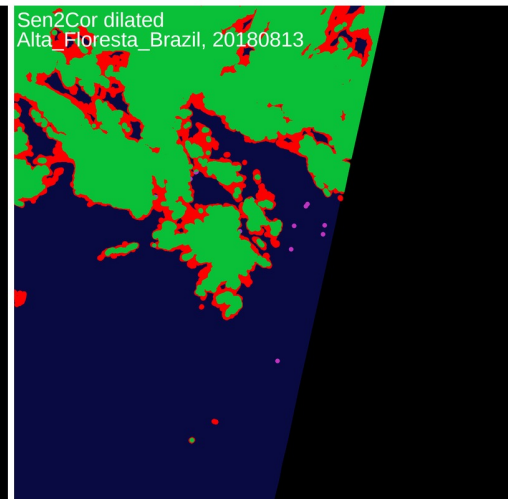

Sen2cor

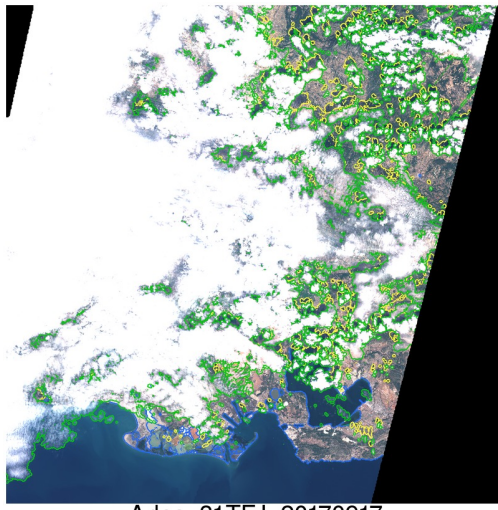

Arles\_31TFJ\_20170917

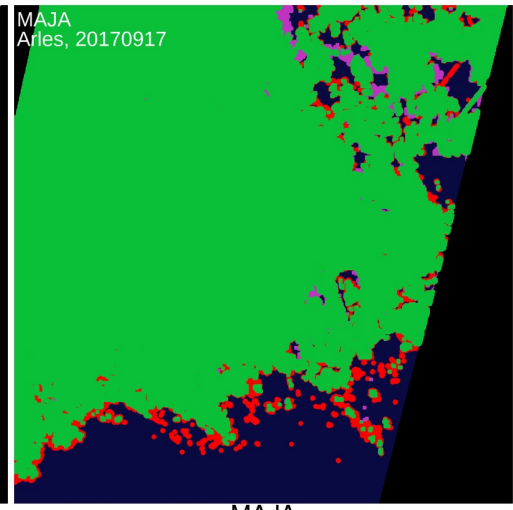

MAJA  
Arles, 20170917

MAJA

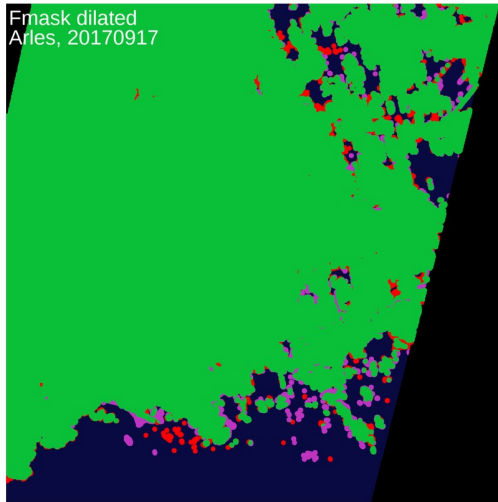

Fmask dilated  
Arles, 20170917

FMask

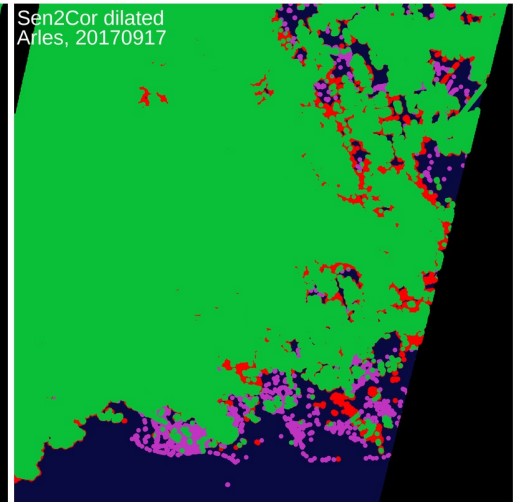

Sen2Cor dilated  
Arles, 20170917

Sen2cor

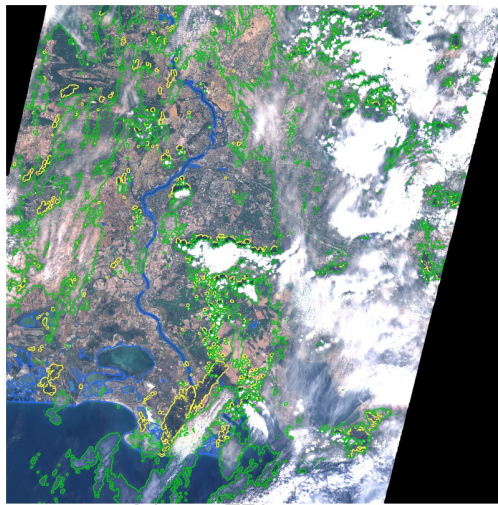

Arles\_31TFJ\_20171002

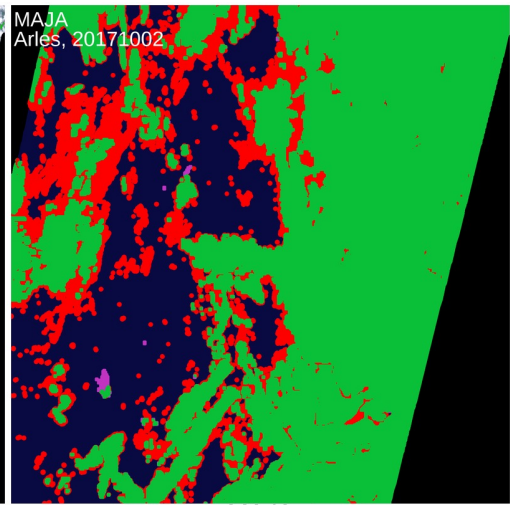

MAJA

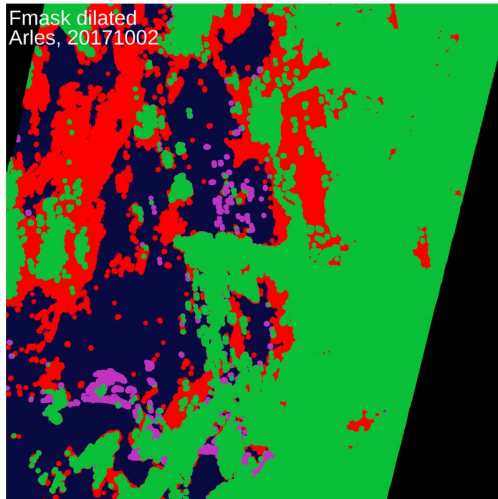

FMask

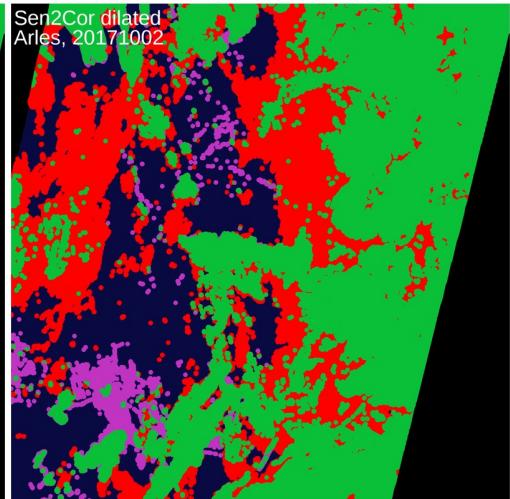

Sen2cor

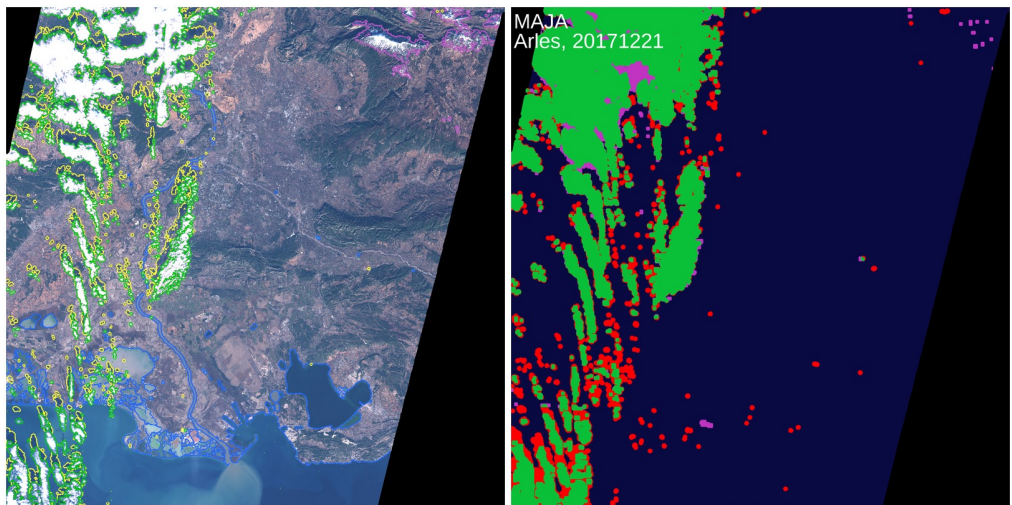

Arles\_31TFJ\_20171221

MAJA

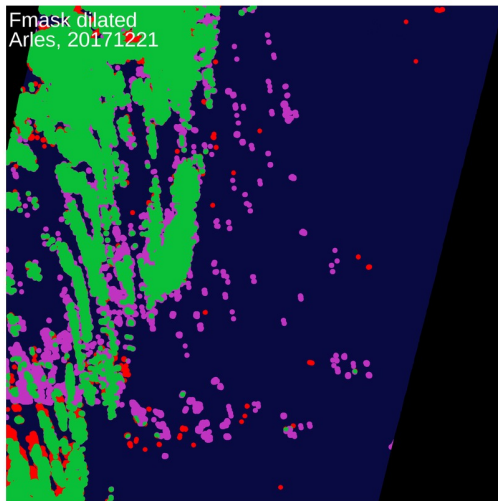

Fmask dilated  
Arles, 20171221

FMask

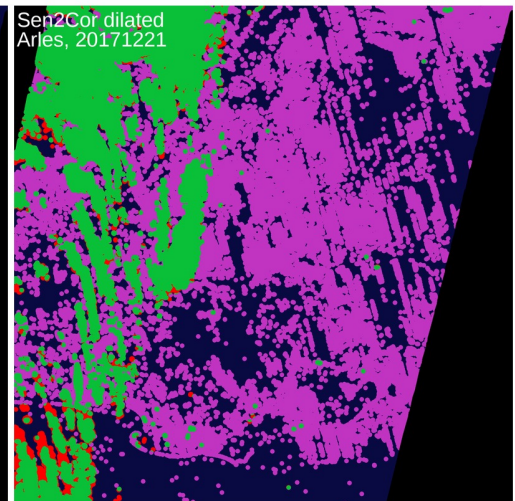

Sen2Cor dilated  
Arles, 20171221

Sen2cor



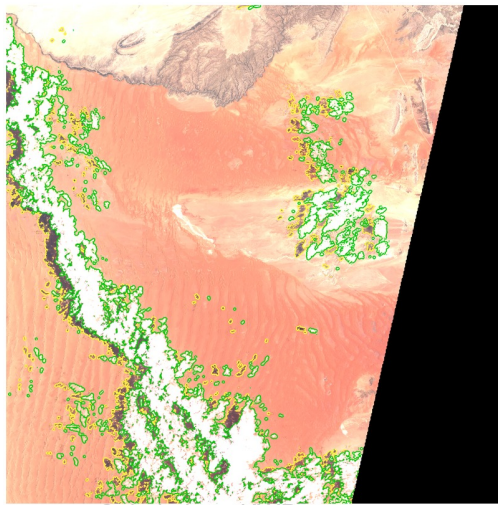

Gobabeb\_33KWP\_20161221

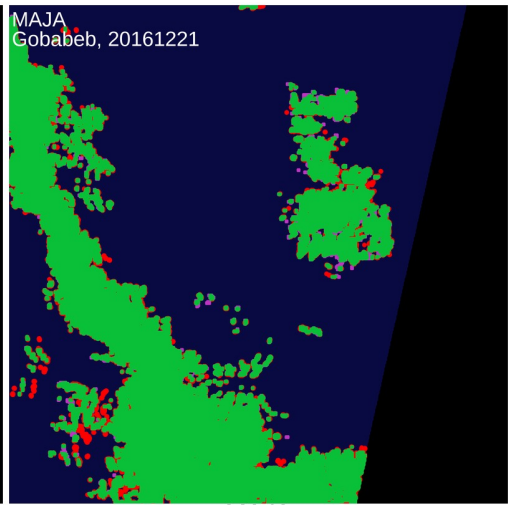

MAJA

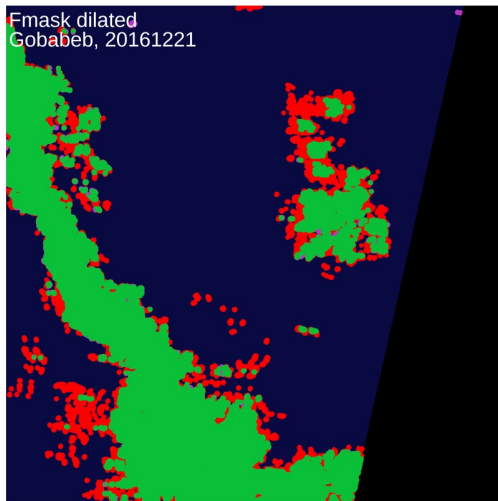

FMask

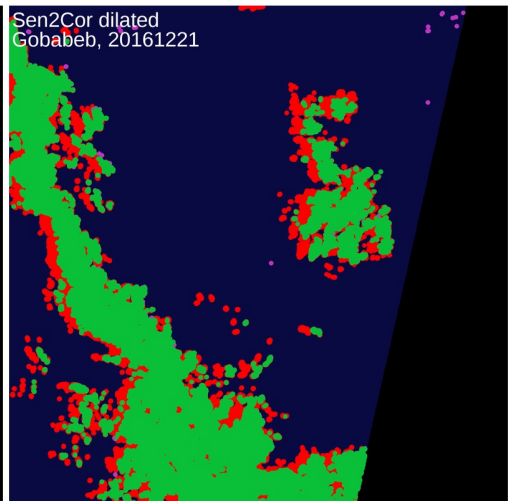

Sen2cor

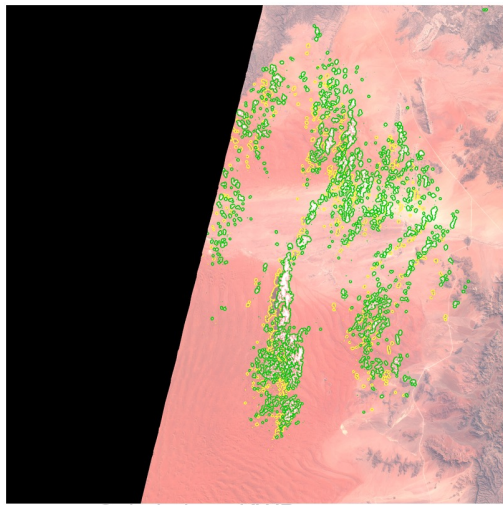

Gobabeb\_33KWP\_20170909

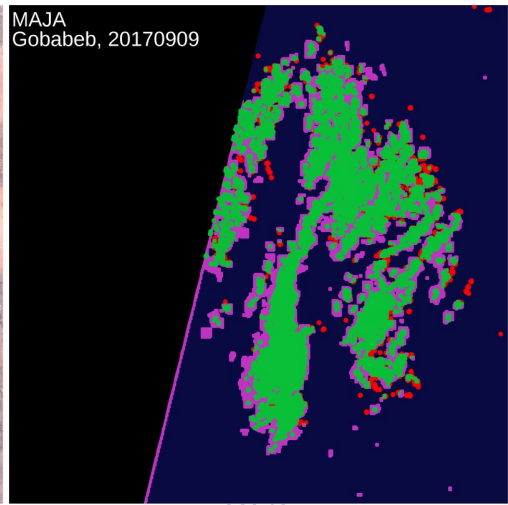

MAJA  
Gobabeb, 20170909

MAJA

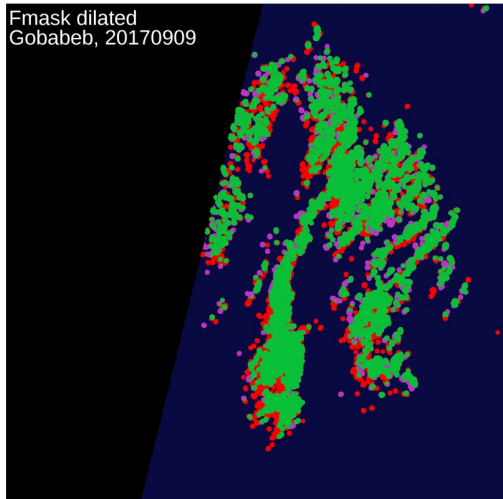

Fmask dilated  
Gobabeb, 20170909

FMask

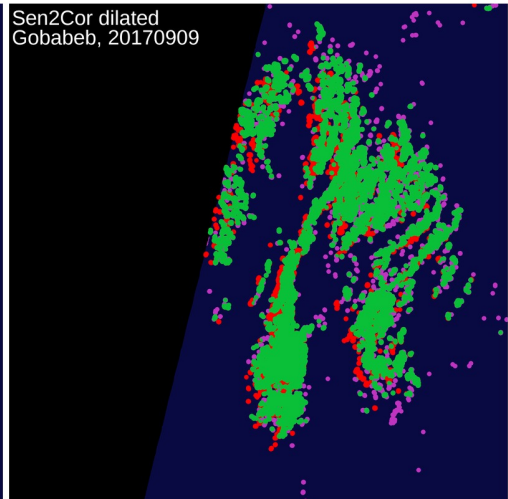

Sen2Cor dilated  
Gobabeb, 20170909

Sen2cor

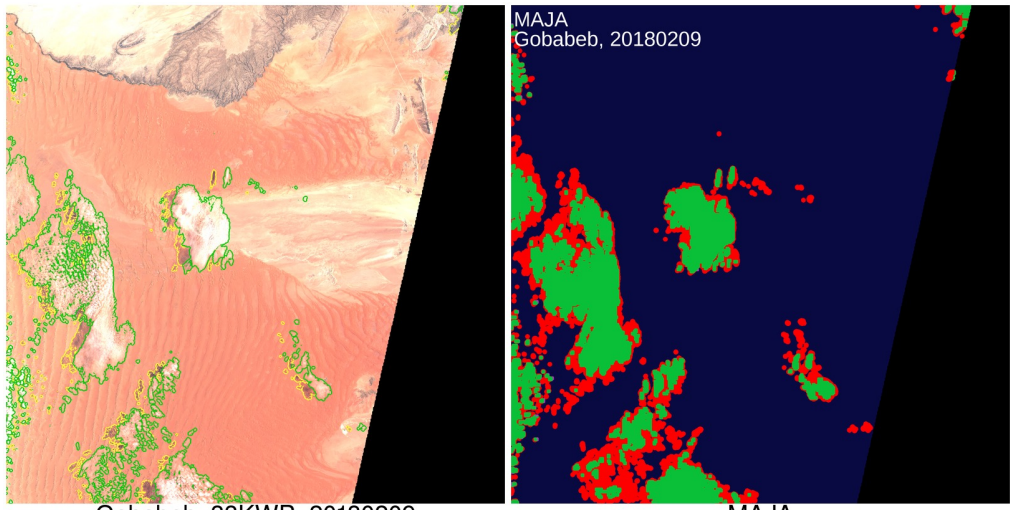

Gobabeb\_33KWP\_20180209

MAJA

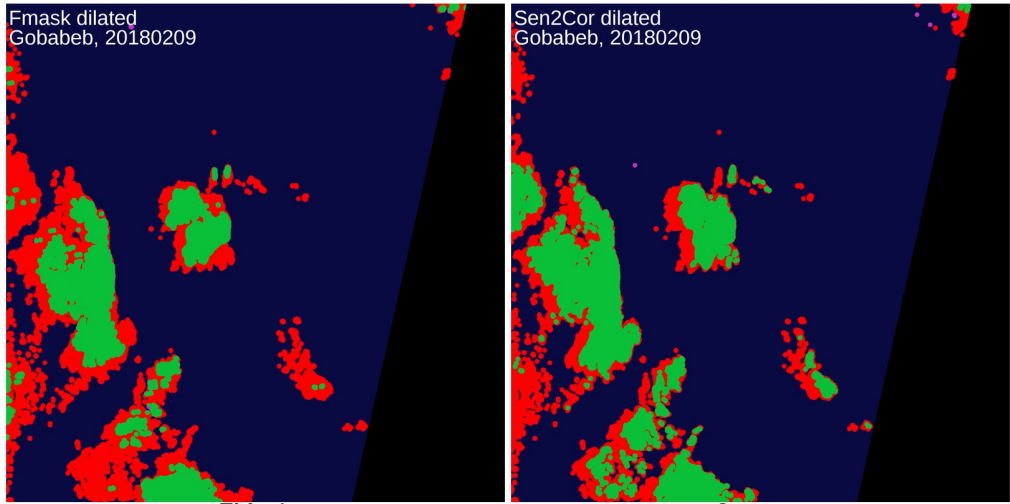

FMask

Sen2cor

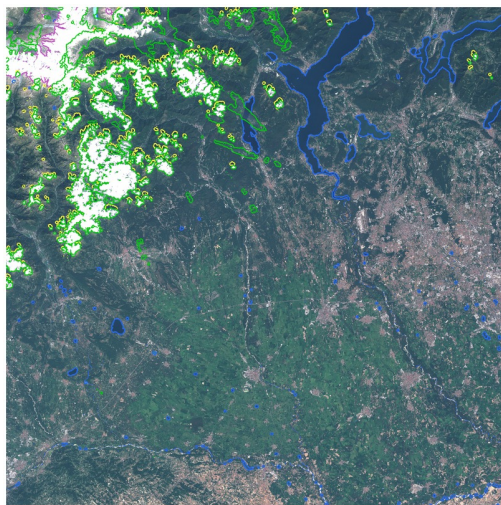

Ispra\_32TMR\_20170815

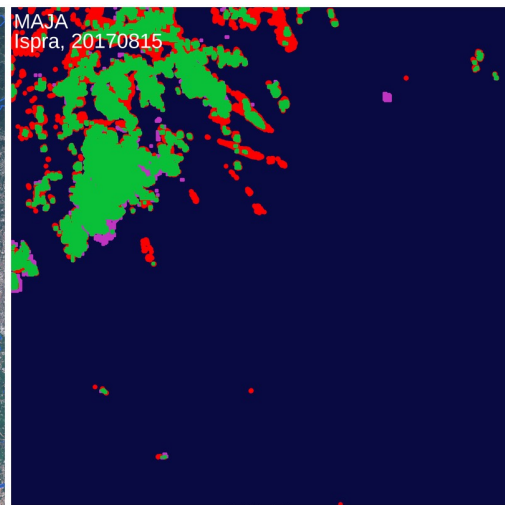

MAJA

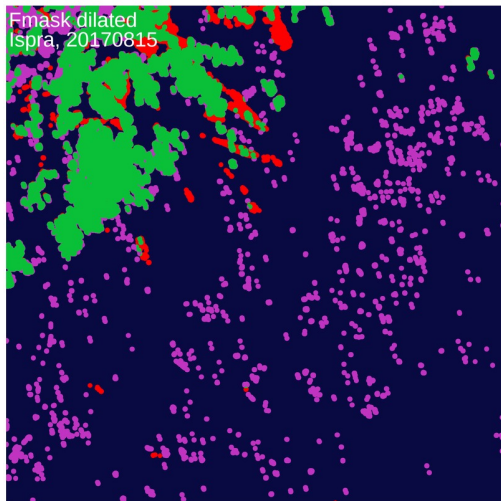

FMask

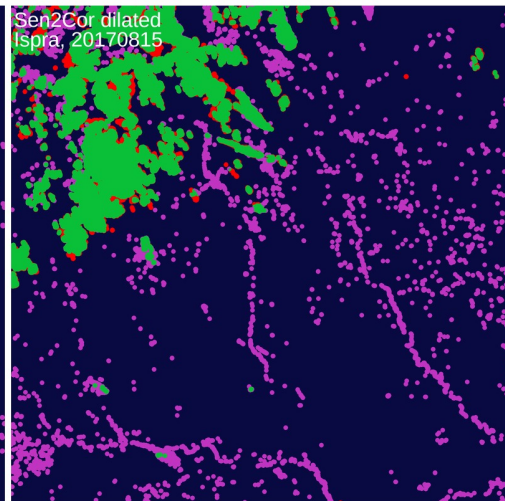

Sen2cor

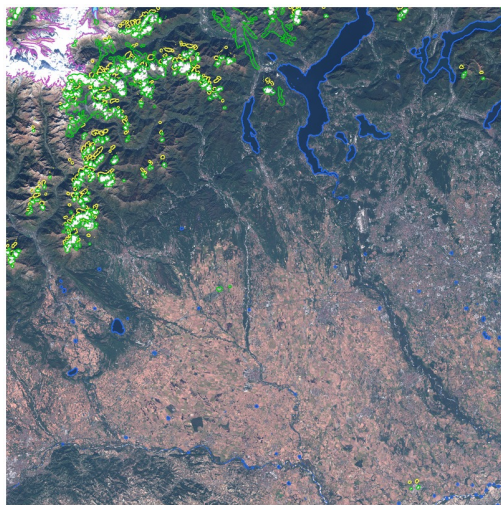

Ispra\_32TMR\_20171009

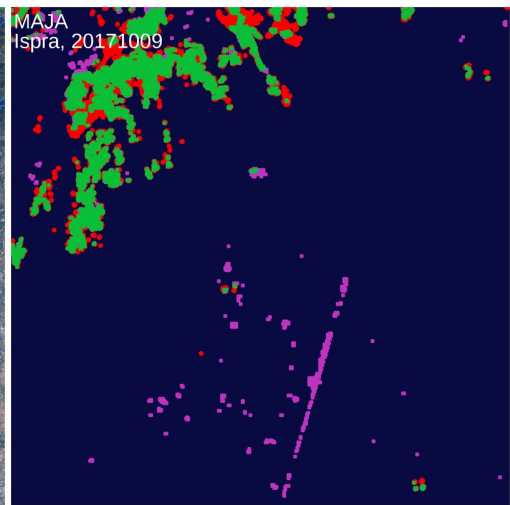

MAJA

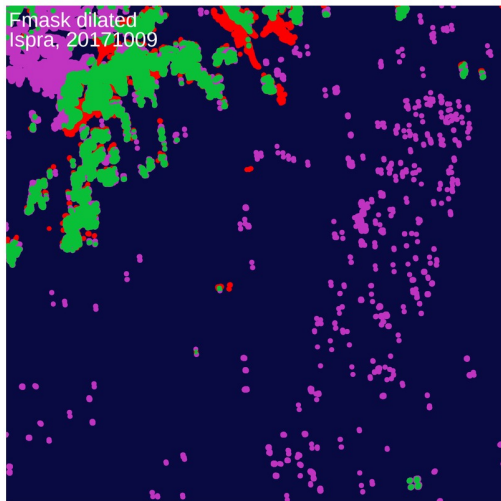

FMask

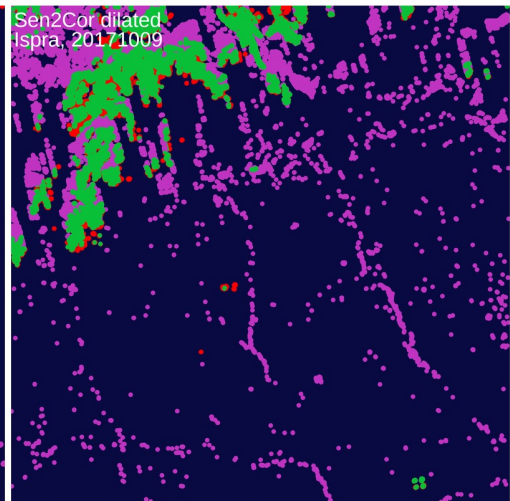

Sen2cor

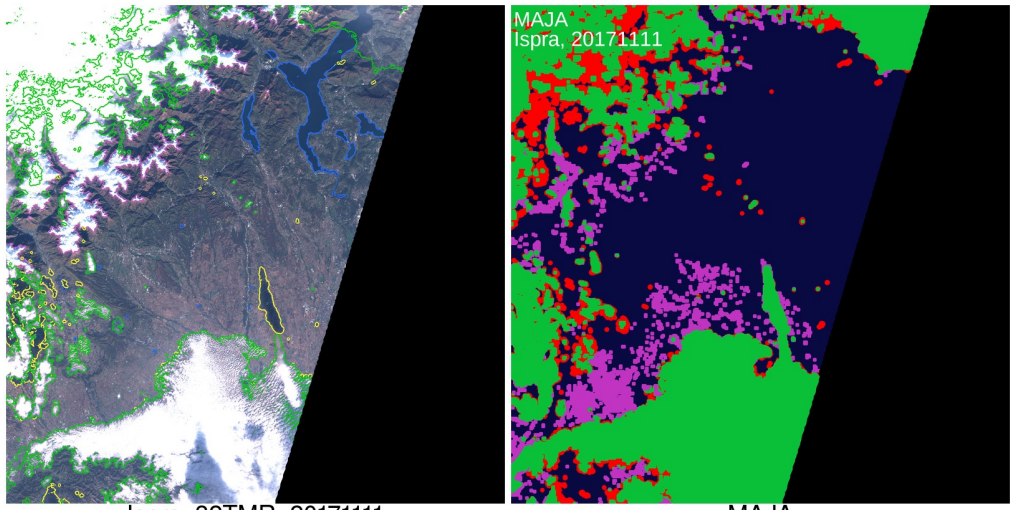

Ispra\_32TMR\_20171111

MAJA

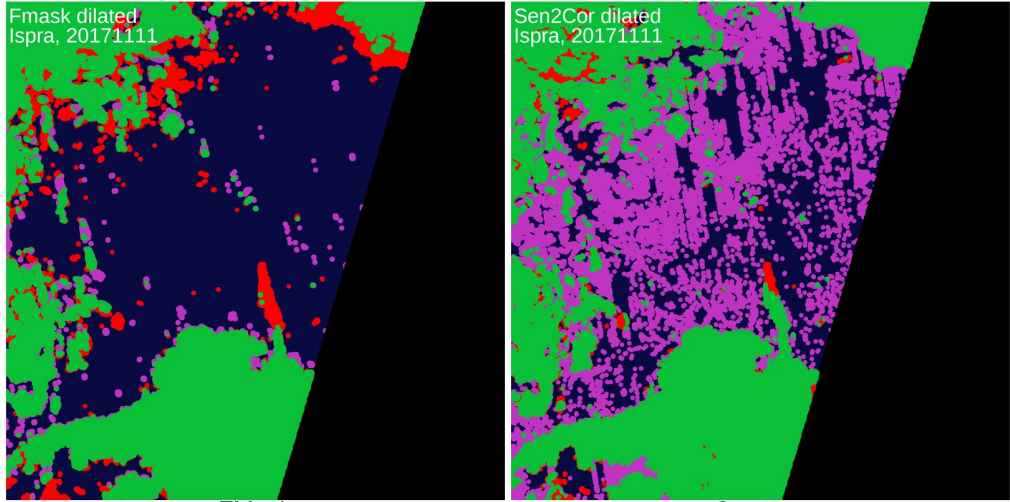

FMask

Sen2cor

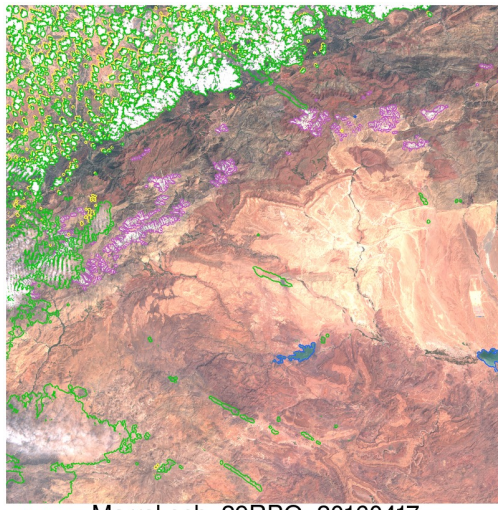

Marrakech\_29RPQ\_20160417

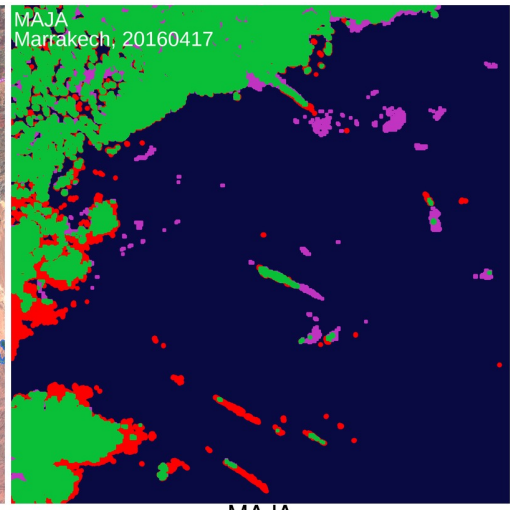

MAJA

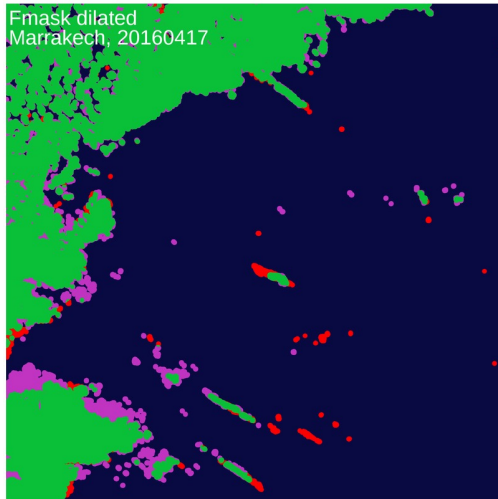

FMask

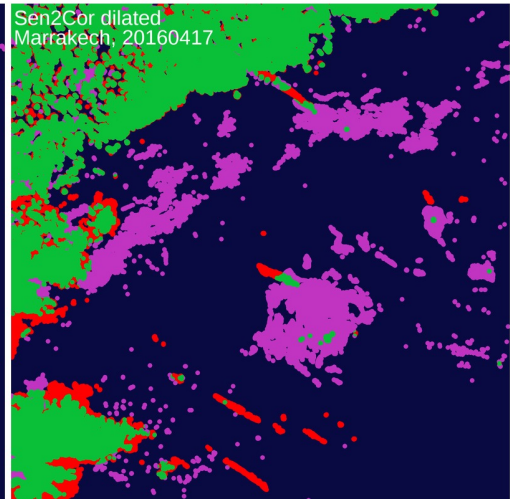

Sen2cor

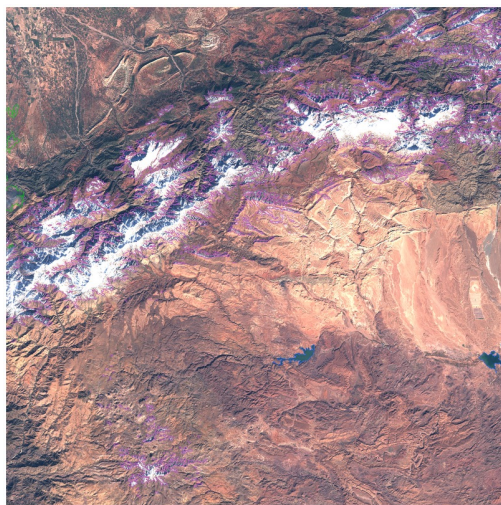

Marrakech\_29RPQ\_20170102

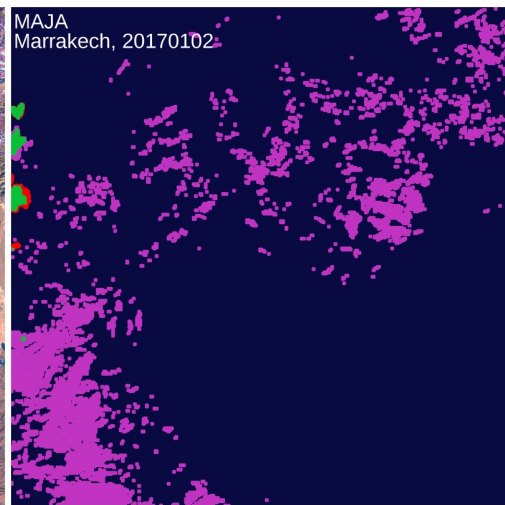

MAJA

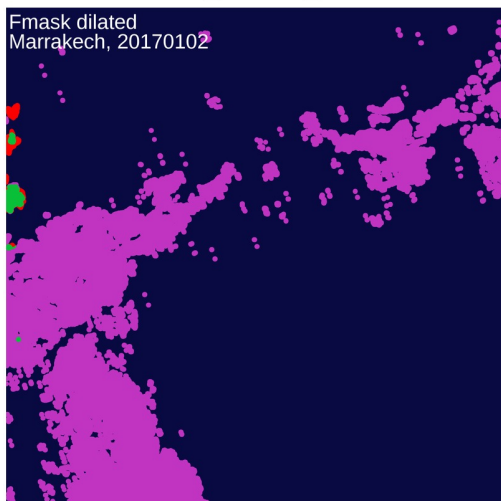

FMask

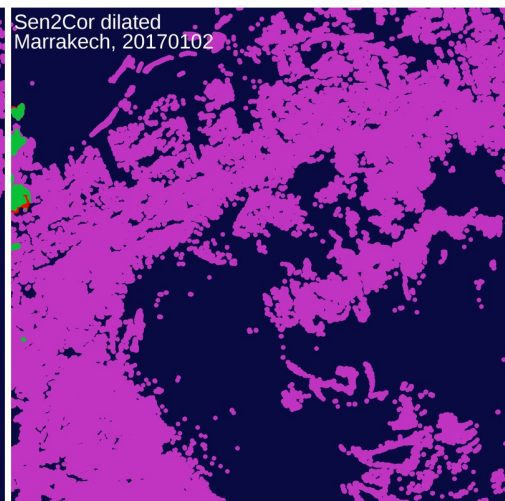

Sen2cor



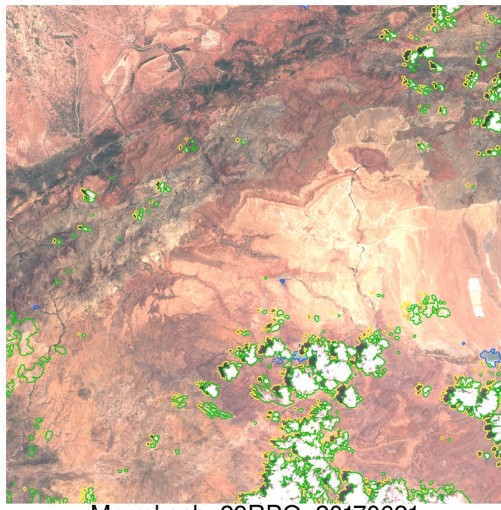

Marrakech\_29RPQ\_20170621

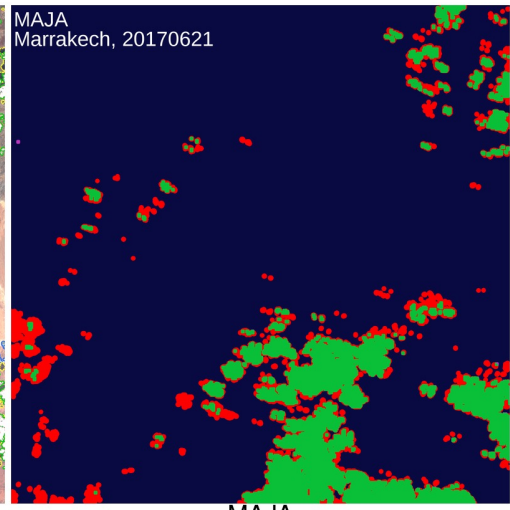

MAJA

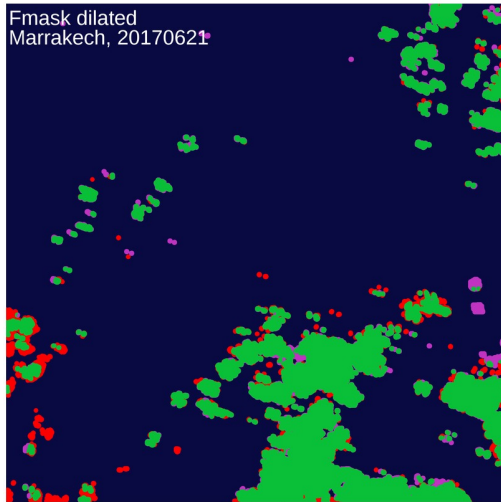

FMask

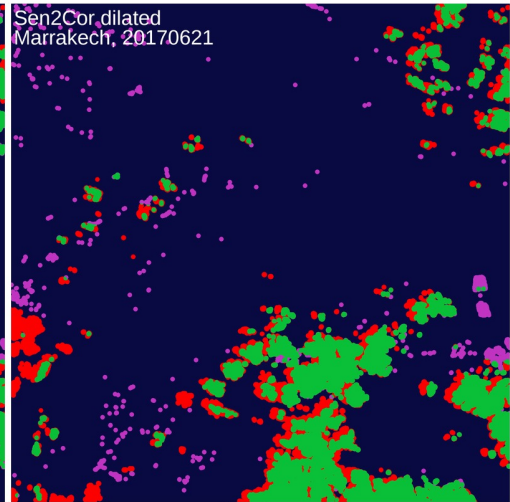

Sen2cor

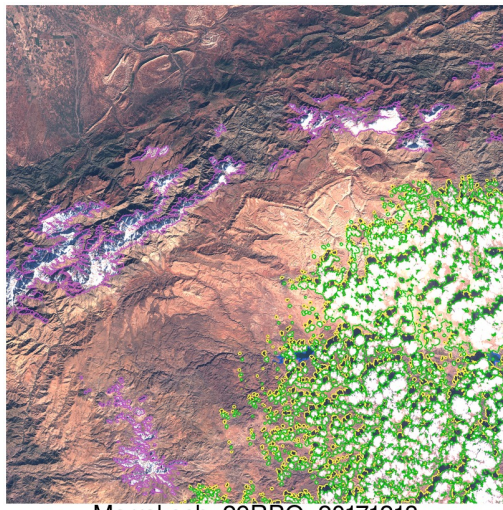

Marrakech\_29RPQ\_20171218

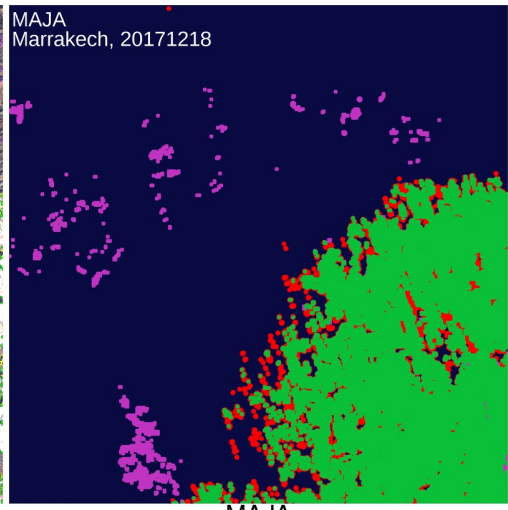

MAJA

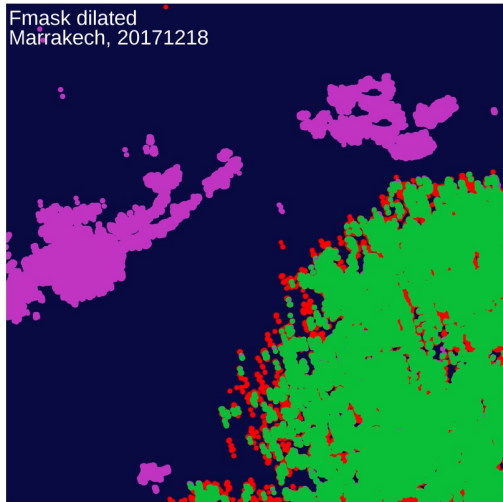

FMask

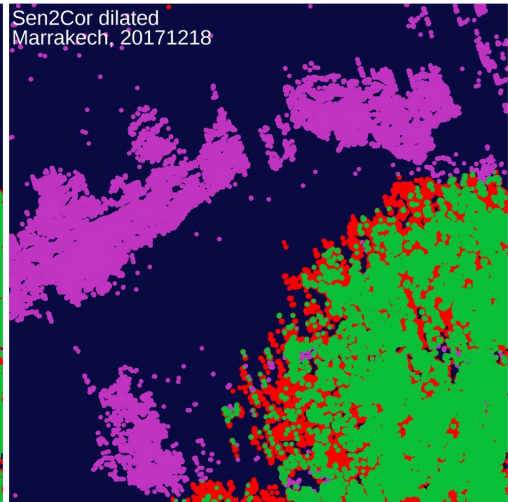

Sen2cor

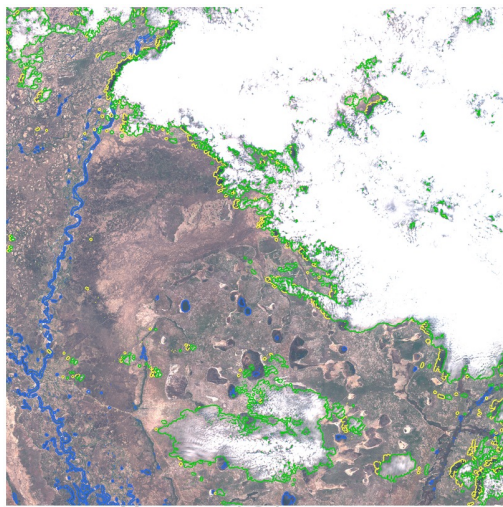

Mongu\_34LGJ\_20161112

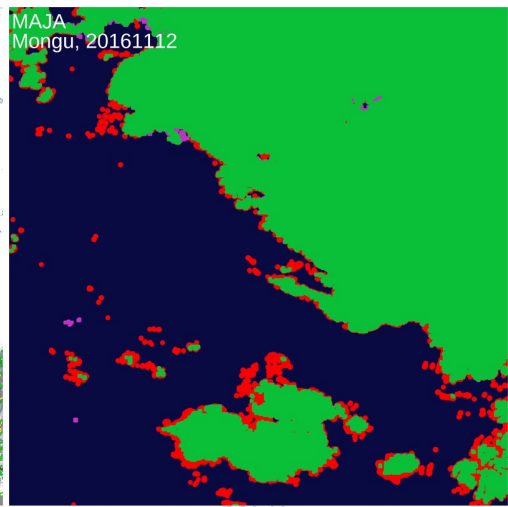

MAJA

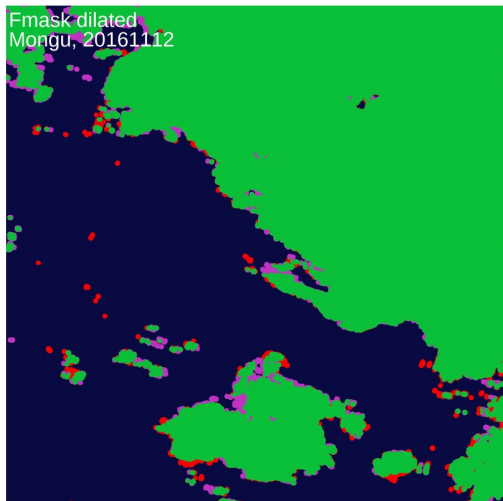

FMask

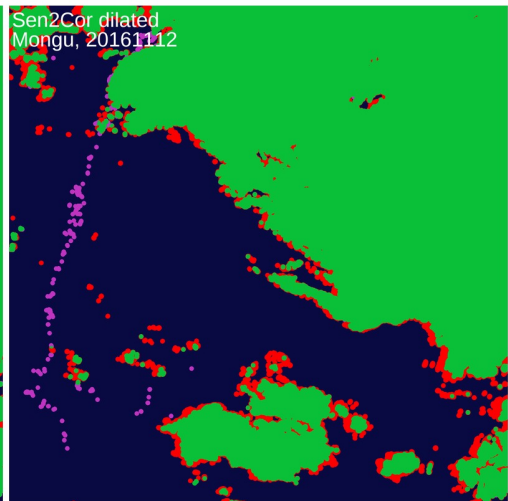

Sen2cor

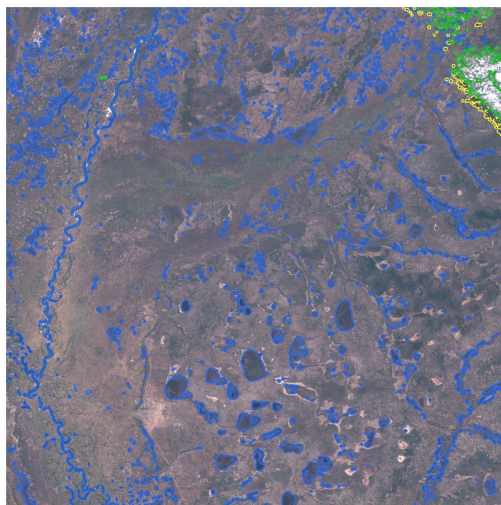

Mongu\_34LGJ\_20170804

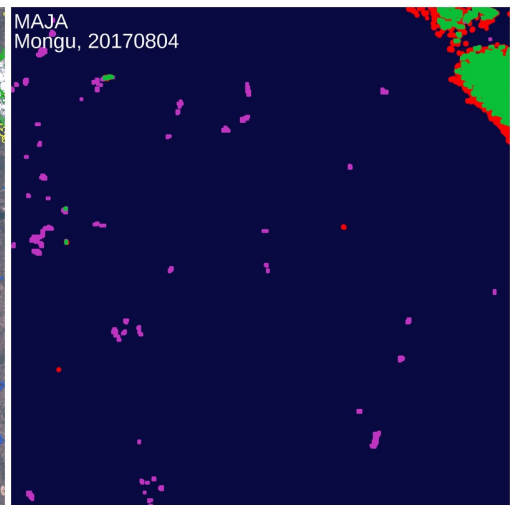

MAJA

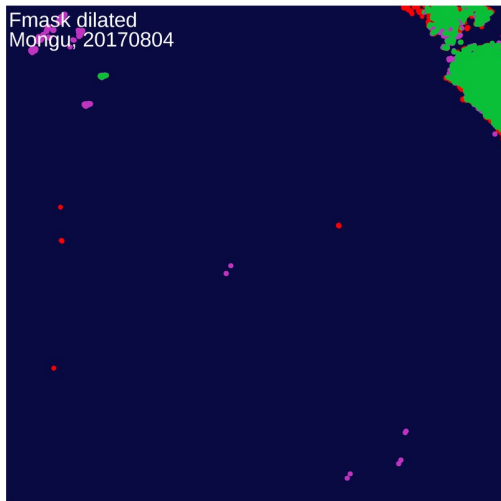

FMask

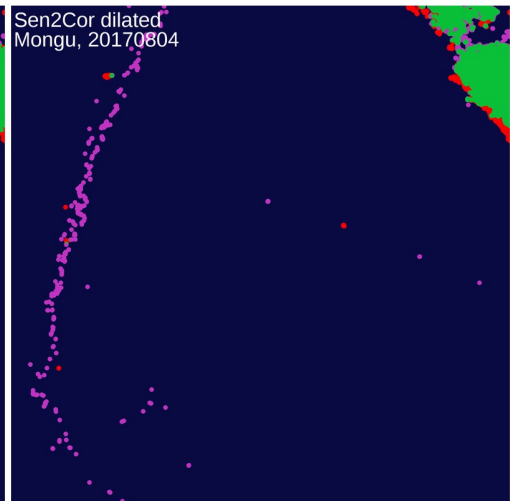

Sen2cor

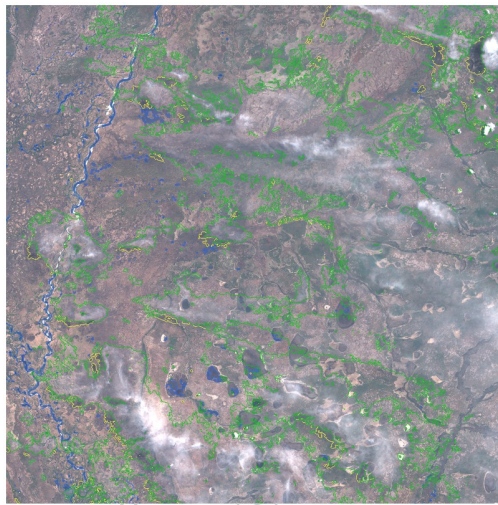

Mongu\_34LGJ\_20171013

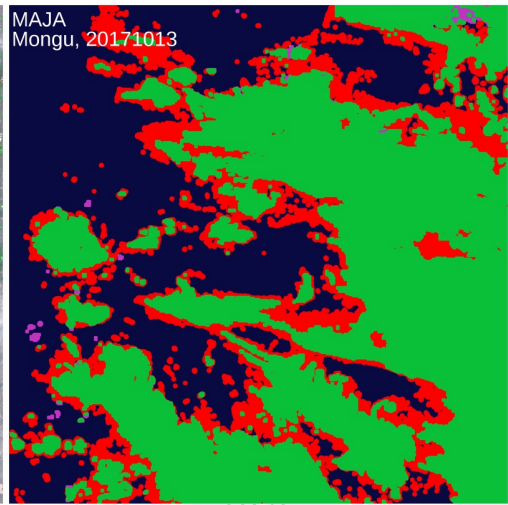

MAJA

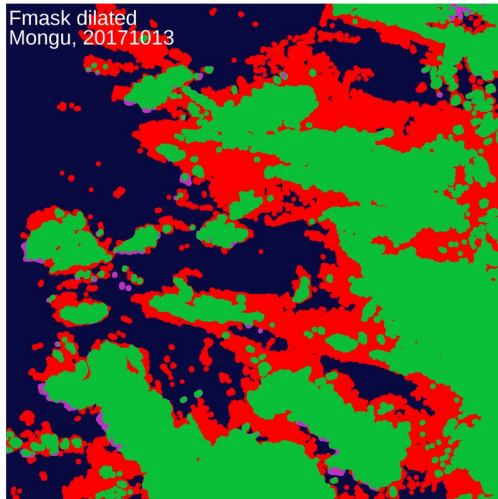

FMask

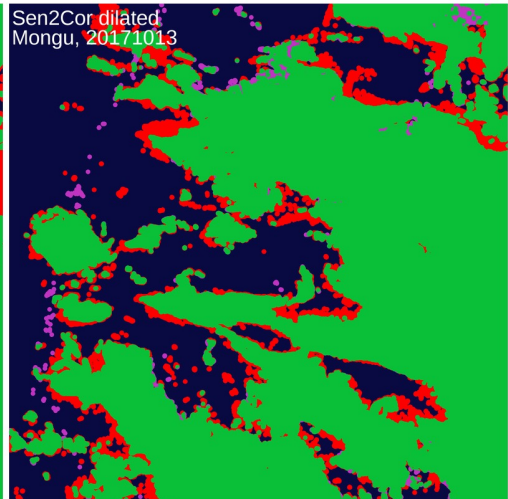

Sen2cor

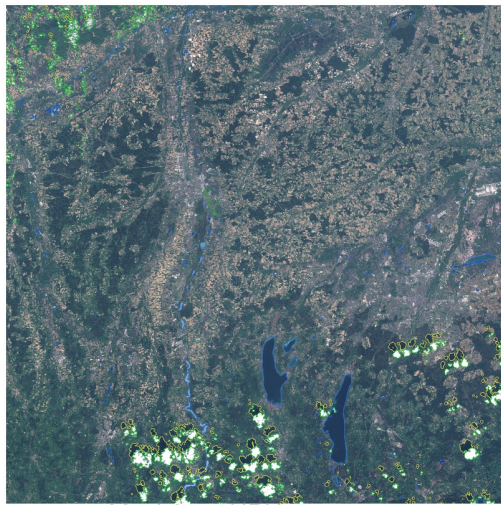

Munich\_32UPU\_20180422

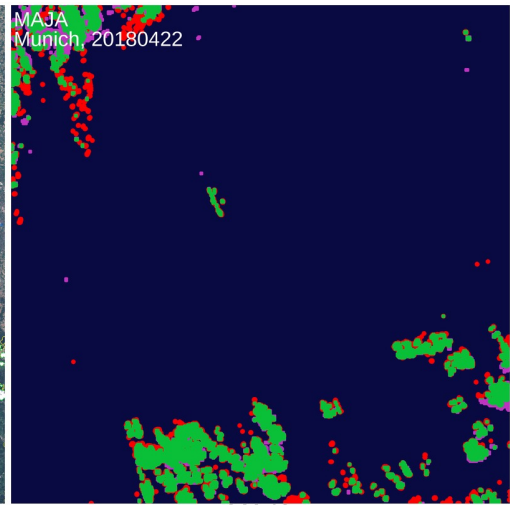

MAJA

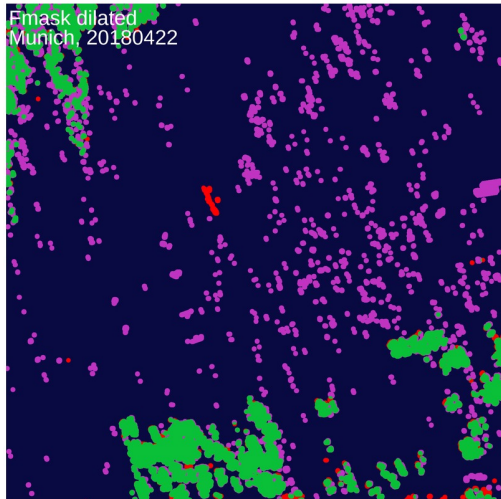

FMask

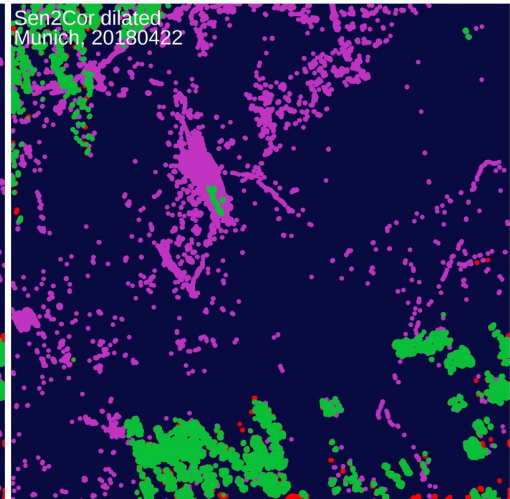

Sen2cor

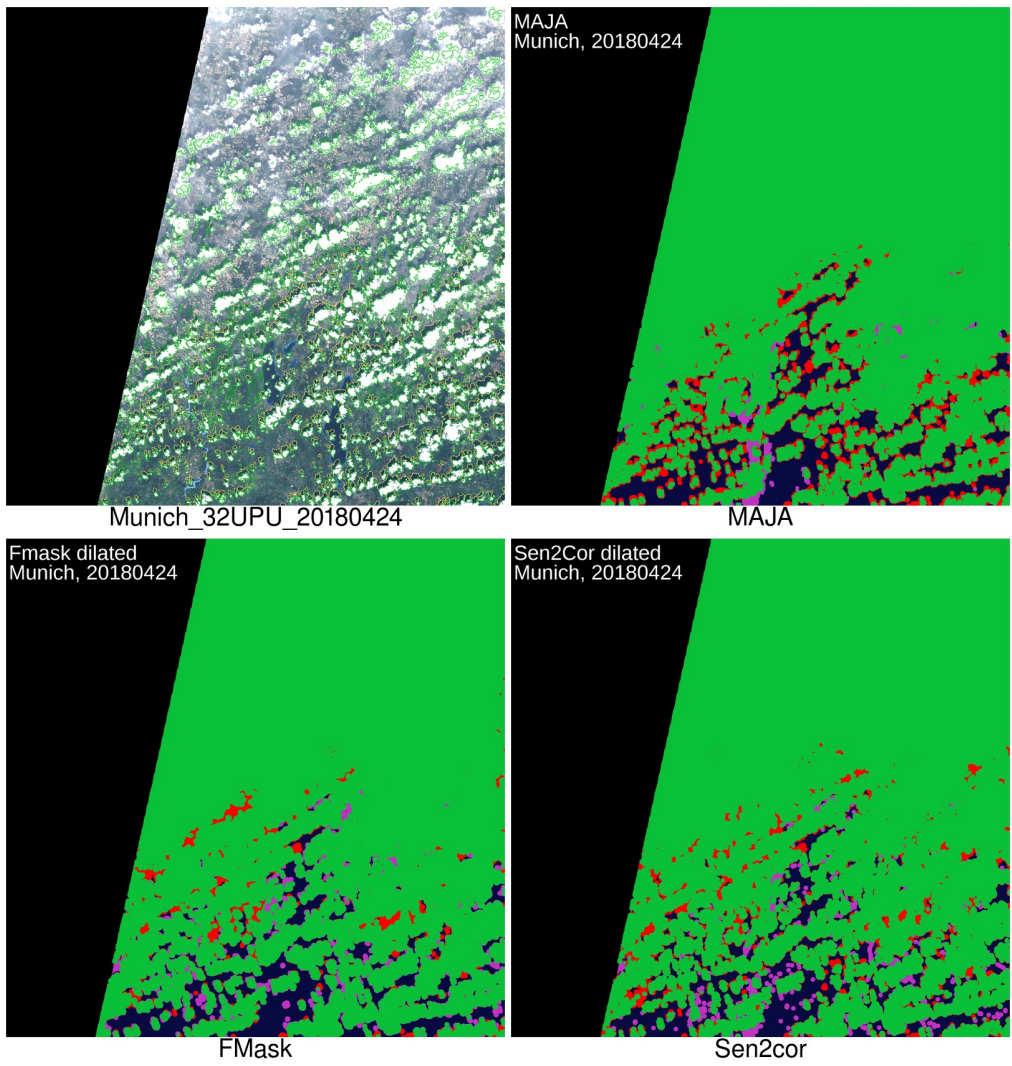

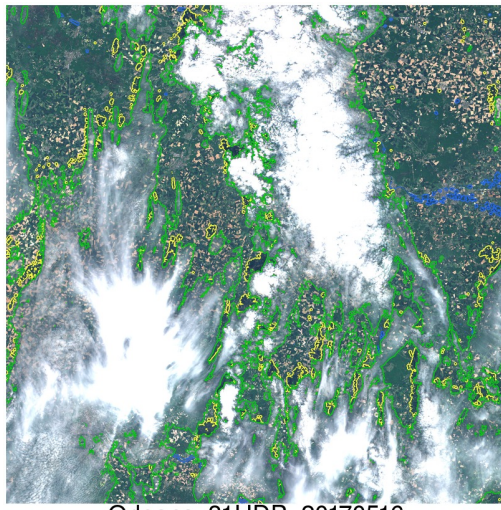

Orleans\_31UDP\_20170516

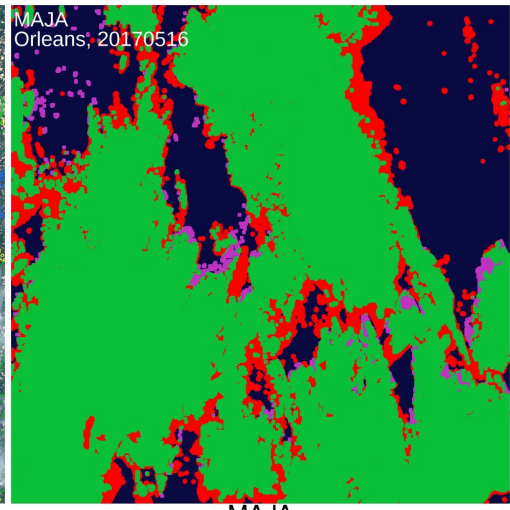

MAJA

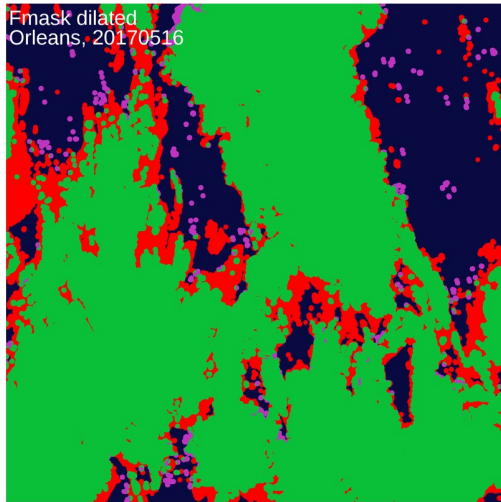

FMask

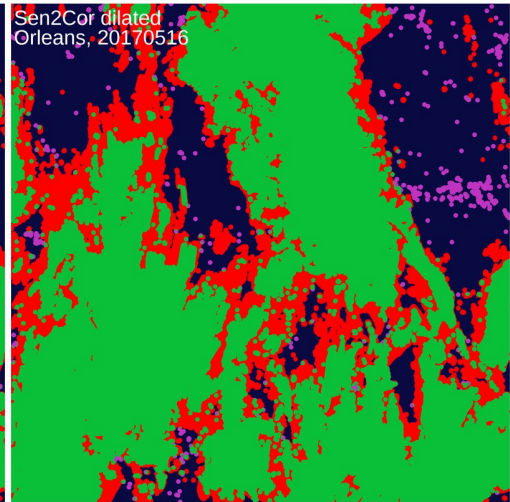

Sen2cor



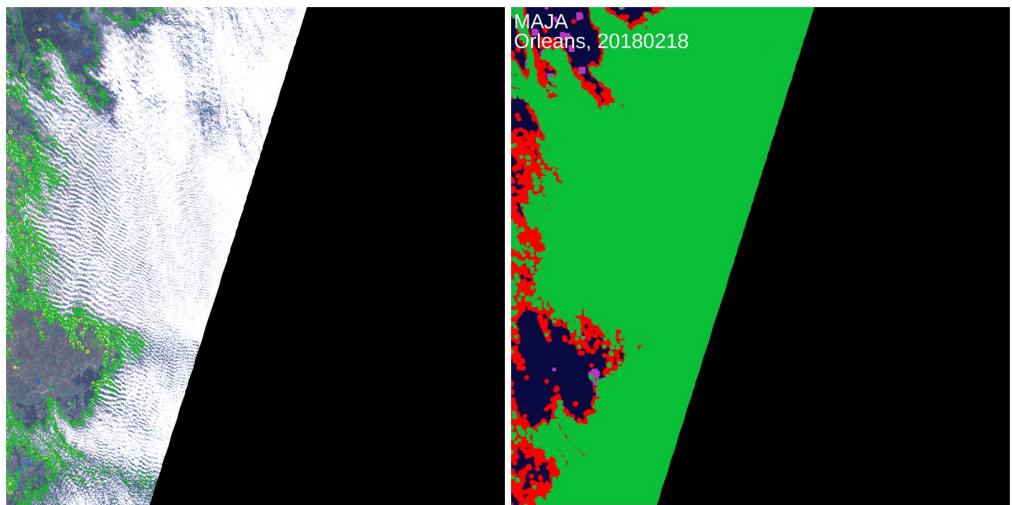

Orleans\_31UDP\_20180218

MAJA

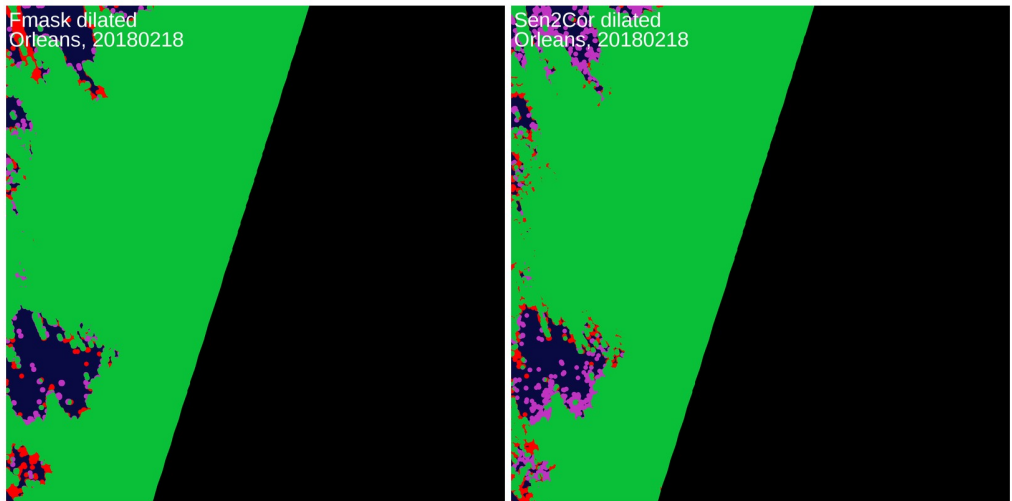

FMask

Sen2cor

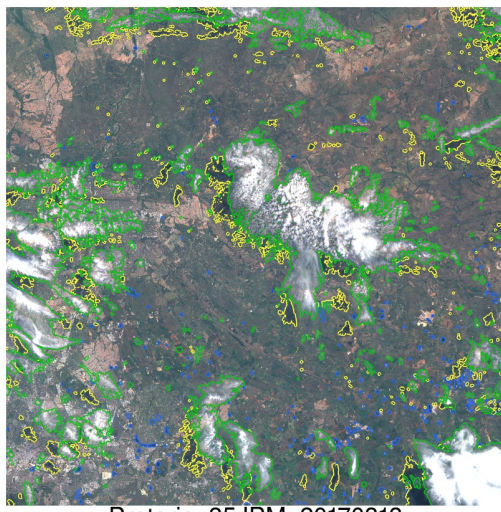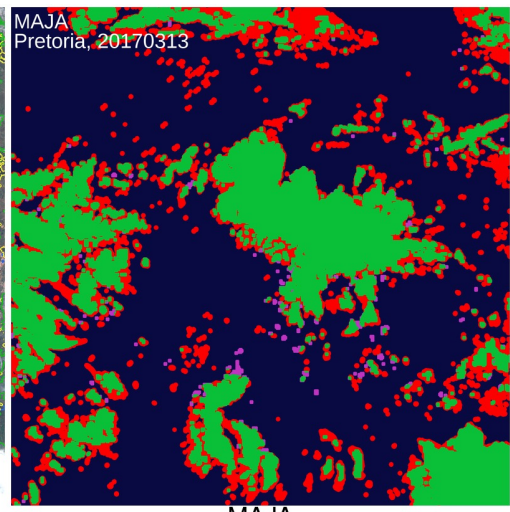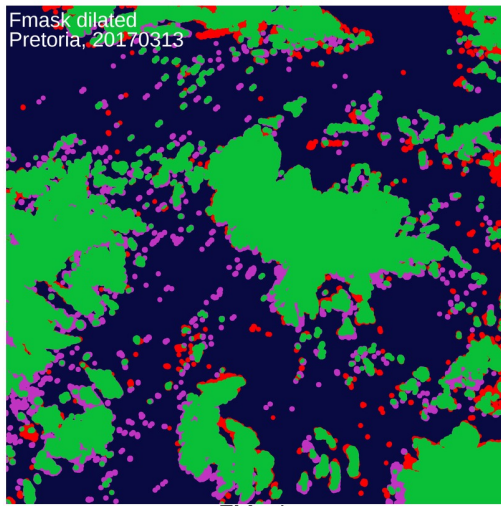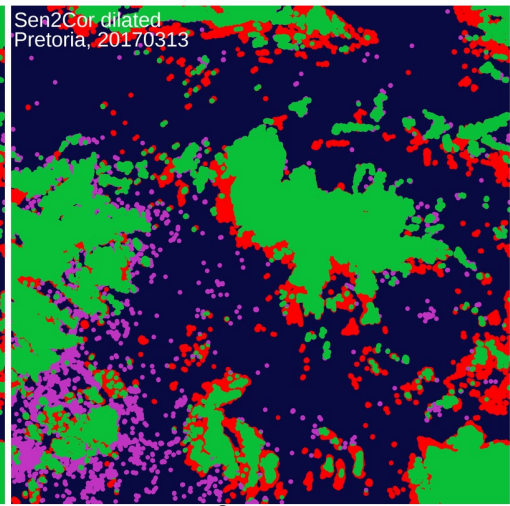

FMask

Sen2cor

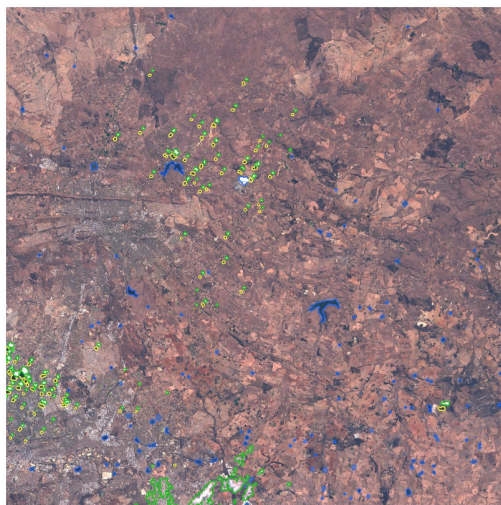

Pretoria\_35JPM\_20170820

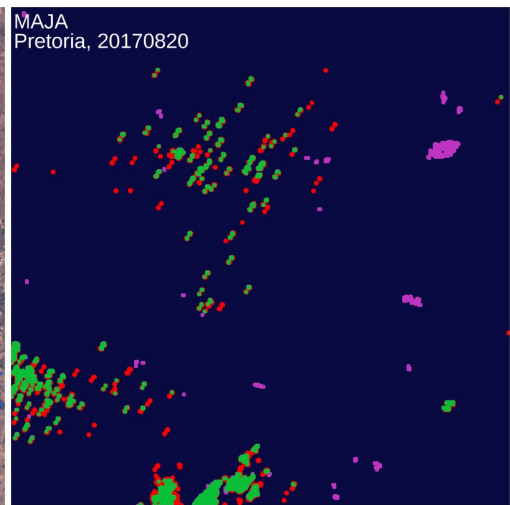

MAJA

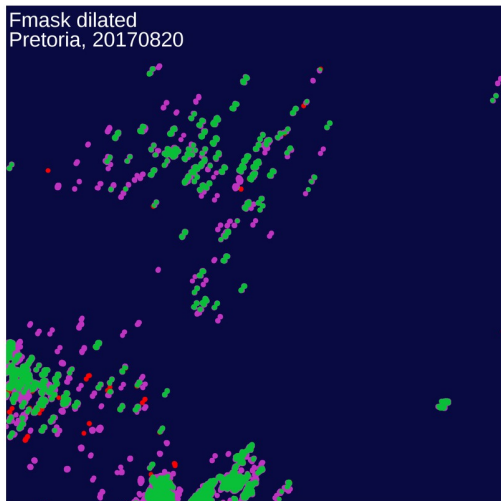

FMask

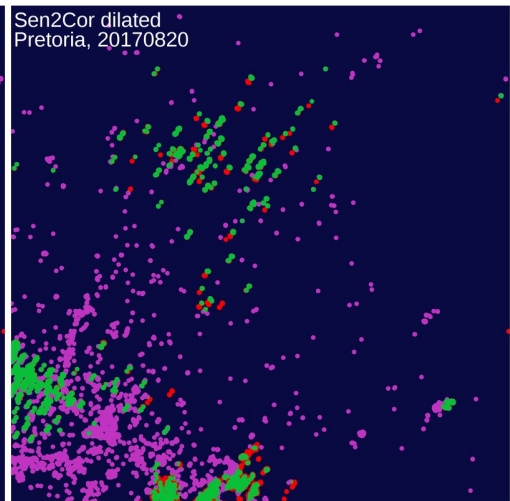

Sen2cor

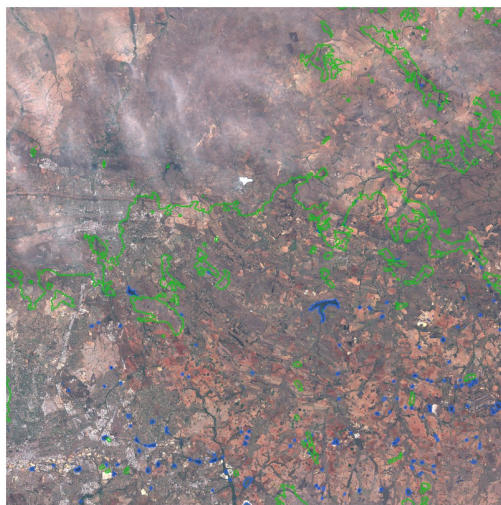

Pretoria\_35JPM\_20171014

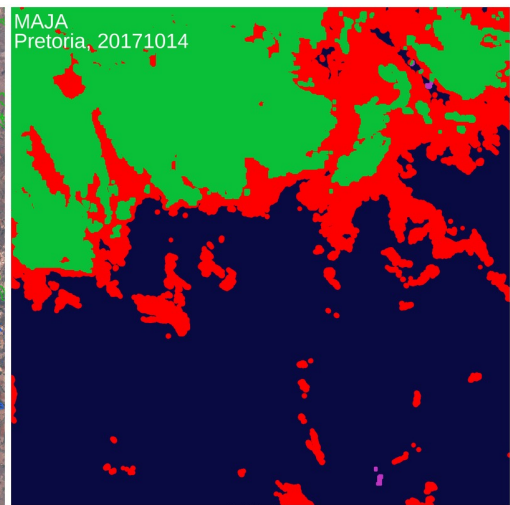

MAJA

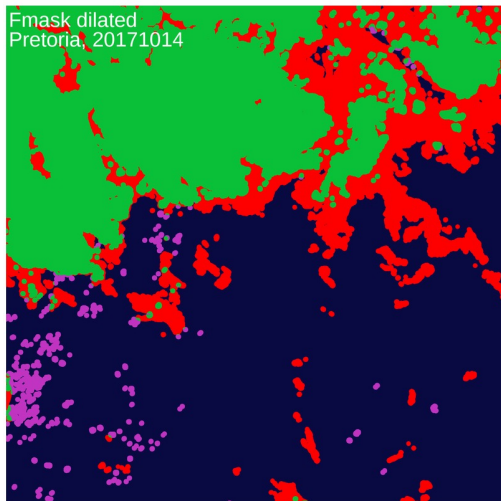

FMask

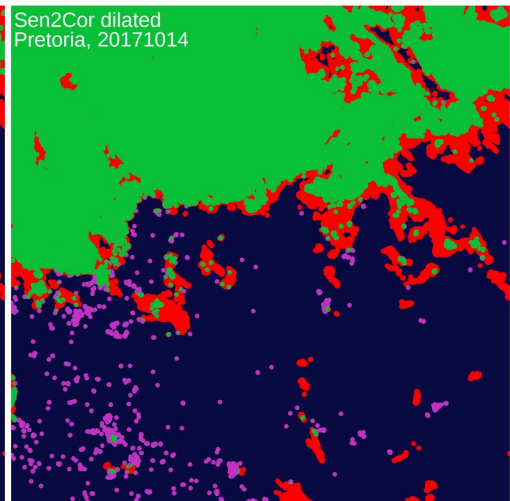

Sen2cor

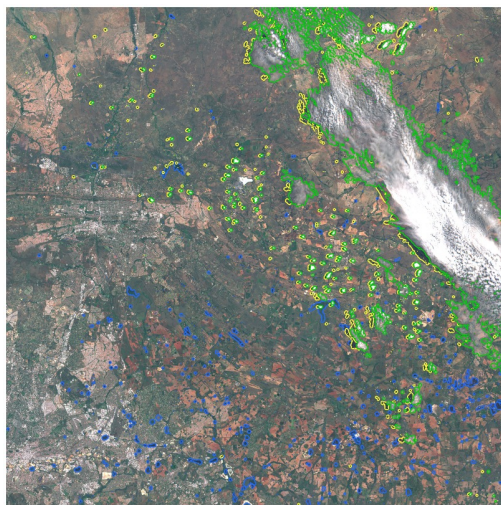

Pretoria\_35JPM\_20171213

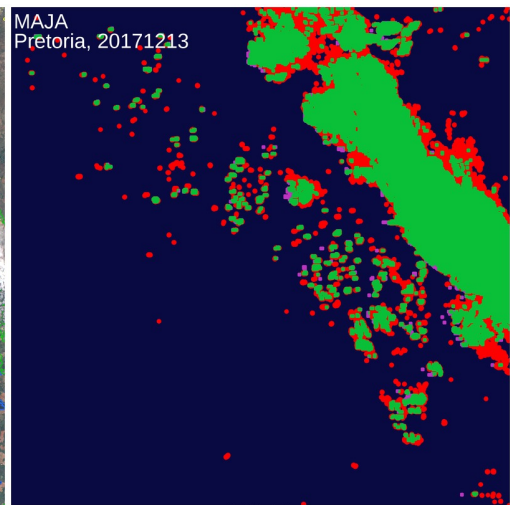

MAJA

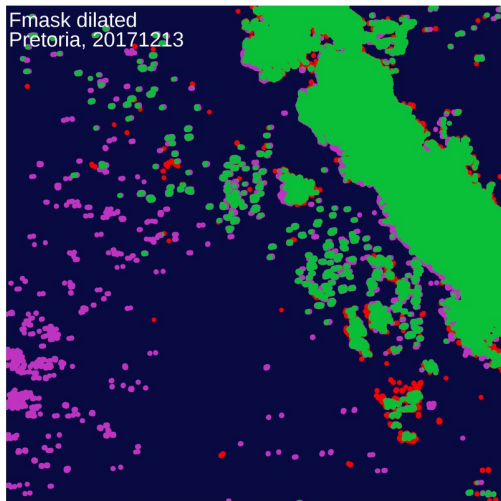

FMask

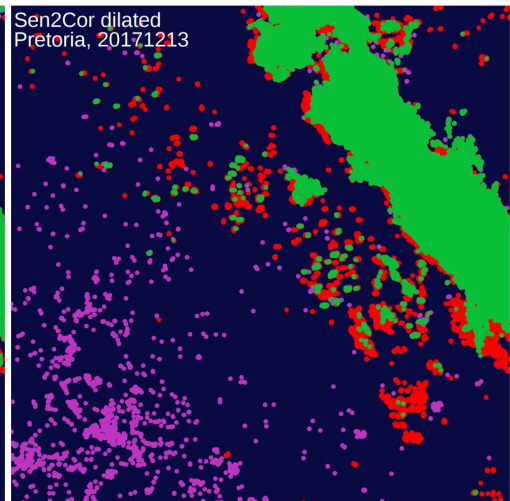

Sen2cor

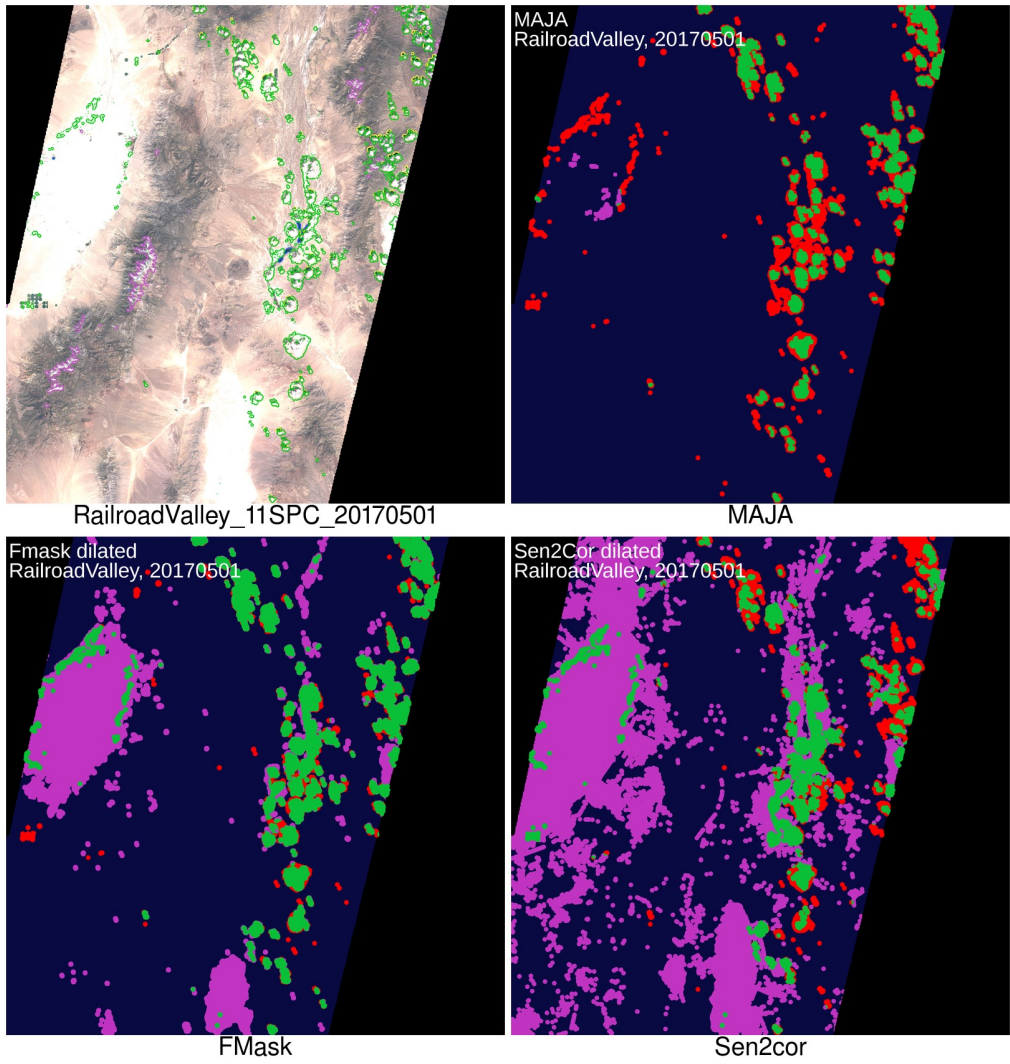

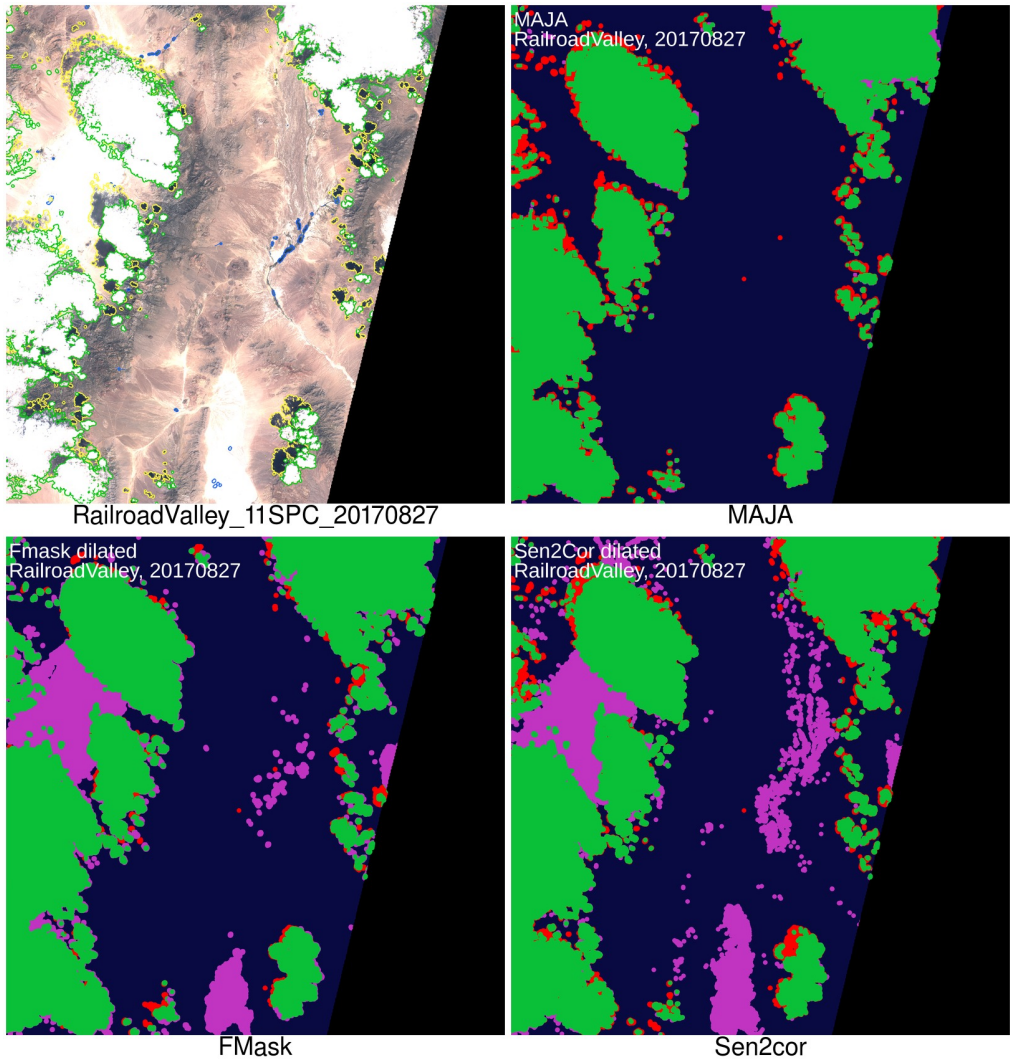

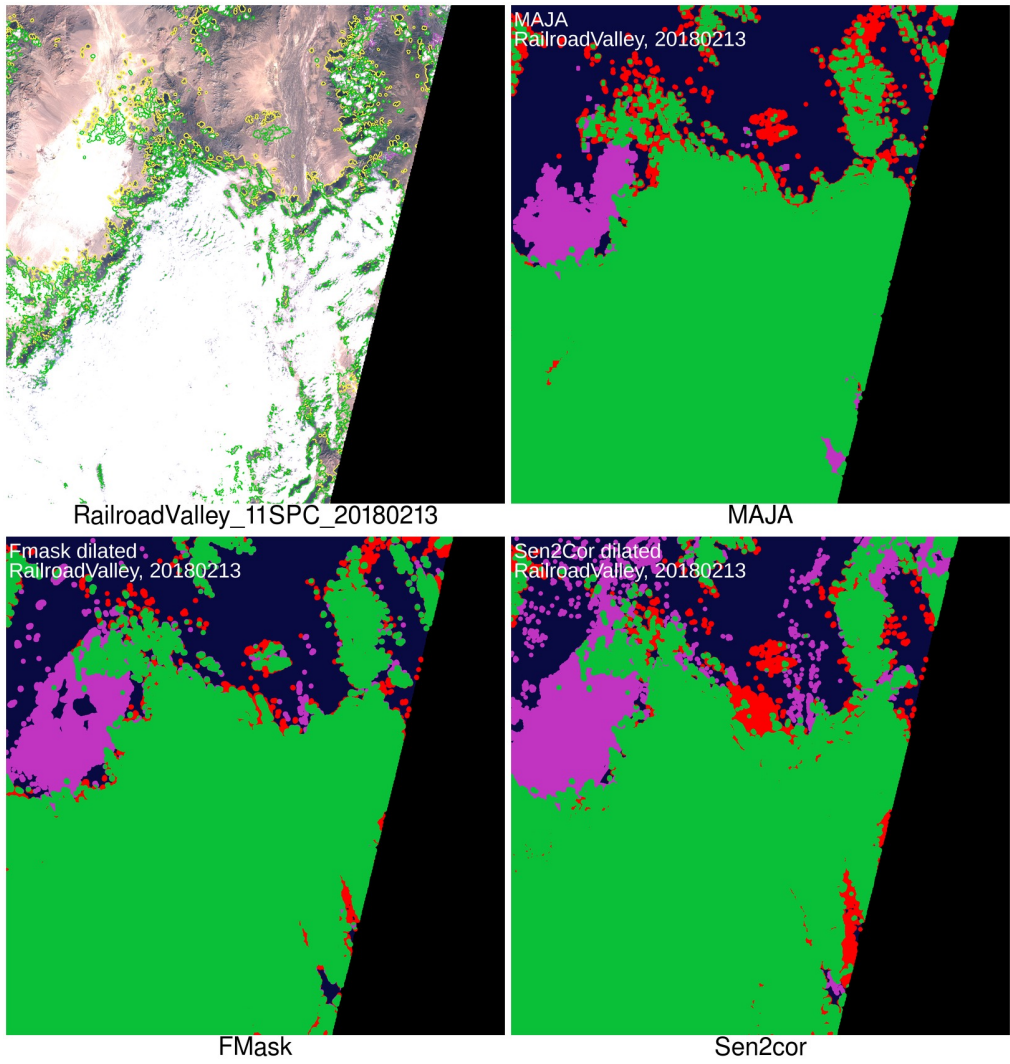

Supplement: s1 [file s1]
